# Supplementary material
Source: MDPI journal article supplement (https://www.mdpi.com/2073-4352/12/12/1717)
Supplement: s1 [file s1]

# Structural Characterization of Alzheimer DNA Promoter Sequences from Amyloid Precursor Gene in Presence of Thioflavin T and Analogs

Hristina Sbirkova-Dimitrova <sup>1,\*</sup>, Rusi Rusew <sup>1</sup>, Nikola Kuvanjiiev <sup>1</sup>, Annie Heroux <sup>2</sup>, Tzanko Doukov <sup>3</sup> and Boris L. Shivachev <sup>1,\*</sup>

<sup>1</sup> Institute of Mineralogy and Crystallography “Acad. Ivan Kostov”, Bulgarian Academy of Sciences, Acad. G. Bonchev str., bl. 107, 1113 Sofia, Bulgaria

<sup>2</sup> XRD2 beamline, Elettra Sincrotrone Trieste S.C.p.A., 34149 Basovizza, Trieste, Italy

<sup>3</sup> Macromolecular Crystallographic Group, Stanford Synchrotron Radiation Lightsource, National Accelerator Laboratory, Stanford University, Stanford, CA 94309

\* Correspondence: sbirkova@mail.bg (H.S-D.); bls@clmc.bas.bg (B.S.) Tel.: +359888066005 (H.S-D.)

**Table S1.** Main characteristics of some of the selected and tested oligonucleotide sequences.

| Name    | Sequence (5'→3')          | MW (g/mol) | GC-content (%) | Extinction Coefficient (mol.cm) | T <sub>m</sub> [°C] | Bases |
|---------|---------------------------|------------|----------------|---------------------------------|---------------------|-------|
| PAD1_F  | 5'-AAATGAGGTGGAGAATGTA-3' | 5965       | 36.8           | 240430                          | 50.2                | 19    |
| PAD1_R  | 5'-TACATTCTCCACCTCATT-3'  | 5649       | 36.8           | 333460                          | 50.2                | 19    |
| PADS_F  | 5'-AATGAGGTGGAGAATGT-3'   | 5338       | 41             | 166980                          | 48                  | 17    |
| PADS_R  | 5'-ACATTCTCCACCTCATT-3'   | 5040       | 41             | 282040                          | 48                  | 17    |
| PADM_F  | 5'-AATGAGGTGGAGAAT-3'     | 3646       | 40             | 313040                          | 42.4                | 15    |
| PADM_R  | 5'-ATTCTCCACCTCATT-3'     | 3357       | 40             | 115440                          | 42.4                | 15    |
| PAD102  | 5'-TATACAGCTGTATA-3'      | 4261       | 29             | 251730                          | 35                  | 14    |
| 8ASH    | 5'-CCGGGGTACCCCGG-3'      | 4265       | 86             | 219380                          | 58                  | 14    |
| ABCC1_F | 5'-GCCCACCACGGC-3'        | 3576       | 83             | 231420                          | 36                  | 12    |
| ABCC1_R | 5'-GCCGTGGTGGGC-3'        | 3718       | 83             | 245110                          | 32                  | 12    |
| 1QV4*   | 5'-CGTGAATTCACG-3'        | 3645       | 50             | 111900                          | 36                  | 12    |
| PADL1   | 5'-AACAGCTGTT-3''         | 3027       | 40             | 332700                          | 28                  | 10    |

\* used as control.

**Table S2.** Selected bond lengths and angles for **2** and **3**.

| 2    |      |          | 3    |      |          |
|------|------|----------|------|------|----------|
| Atom | Atom | Length/Å | Atom | Atom | Length/Å |
| S1   | C6   | 1.730(2) | S1   | C6   | 1.735(7) |
| S1   | C7   | 1.754(2) | S1   | C7   | 1.737(7) |
| N1   | C5   | 1.382(2) | N1   | C7   | 1.349(8) |
| N1   | C7   | 1.294(3) | N1   | C5   | 1.402(8) |
| N2   | C7   | 1.384(3) | N1   | C18  | 1.475(8) |
| N2   | C8   | 1.293(3) | N2   | C7   | 1.319(8) |
| N3   | C12  | 1.362(3) | N2   | C8   | 1.306(9) |
| N3   | C16  | 1.441(3) | N3   | C12  | 1.350(8) |

| 2    |      |          | 3    |      |           |
|------|------|----------|------|------|-----------|
| Atom | Atom | Length/Å | Atom | Atom | Length/Å  |
| N3   | C15  | 1.451(3) | N3   | C16  | 1.461(9)  |
| C5   | C6   | 1.410(3) | N3   | C15  | 1.439(8)  |
| C5   | C4   | 1.388(3) | C9   | C14  | 1.417(9)  |
| C6   | C1   | 1.392(3) | C9   | C8   | 1.405(9)  |
| C9   | C8   | 1.435(3) | C9   | C10  | 1.405(9)  |
| C9   | C14  | 1.405(3) | C12  | C13  | 1.421(9)  |
| C9   | C10  | 1.397(3) | C12  | C11  | 1.425(9)  |
| C3   | C4   | 1.370(3) | C6   | C1   | 1.384(9)  |
| C3   | C2   | 1.405(3) | C6   | C5   | 1.392(9)  |
| C11  | C12  | 1.404(3) | C13  | C14  | 1.368(9)  |
| C11  | C10  | 1.369(3) | C1   | C2   | 1.395(10) |
| C12  | C13  | 1.417(3) | C11  | C10  | 1.351(9)  |
| C1   | C2   | 1.380(3) | C2   | C3   | 1.407(10) |
| C14  | C13  | 1.365(3) | C2   | C17  | 1.493(10) |
| C2   | C17  | 1.508(3) | C3   | C4   | 1.371(10) |
|      |      |          | C5   | C4   | 1.371(9)  |
|      |      |          | N31  | C31  | 1.105(16) |
|      |      |          | C30  | C31  | 1.441(18) |

  

| 2    |      |      |            | 3    |      |      |          |
|------|------|------|------------|------|------|------|----------|
| Atom | Atom | Atom | Angle/°    | Atom | Atom | Atom | Angle/°  |
| C6   | S1   | C7   | 88.99(10)  | C6   | S1   | C7   | 91.2(3)  |
| C7   | N1   | C5   | 110.53(18) | C7   | N1   | C5   | 114.5(6) |
| C8   | N2   | C7   | 116.8(2)   | C7   | N1   | C18  | 122.5(6) |
| C12  | N3   | C16  | 121.3(2)   | C5   | N1   | C18  | 123.0(6) |
| C12  | N3   | C15  | 121.2(2)   | C8   | N2   | C7   | 121.1(6) |
| C16  | N3   | C15  | 117.0(2)   | C12  | N3   | C16  | 122.2(6) |
| N1   | C5   | C6   | 115.45(18) | C12  | N3   | C15  | 121.7(6) |
| N1   | C5   | C4   | 126.0(2)   | C15  | N3   | C16  | 116.0(6) |
| C4   | C5   | C6   | 118.58(19) | C8   | C9   | C14  | 121.3(7) |
| C5   | C6   | S1   | 109.02(15) | C10  | C9   | C14  | 117.1(6) |
| C1   | C6   | S1   | 129.75(18) | C10  | C9   | C8   | 121.6(7) |
| C1   | C6   | C5   | 121.2(2)   | N3   | C12  | C13  | 121.7(6) |
| N1   | C7   | S1   | 116.00(15) | N3   | C12  | C11  | 120.6(6) |
| N1   | C7   | N2   | 129.1(2)   | C13  | C12  | C11  | 117.6(6) |
| N2   | C7   | S1   | 114.93(16) | C1   | C6   | S1   | 129.1(5) |
| C14  | C9   | C8   | 122.4(2)   | C1   | C6   | C5   | 119.8(6) |
| C10  | C9   | C8   | 120.3(2)   | C5   | C6   | S1   | 111.0(5) |
| C10  | C9   | C14  | 117.3(2)   | C14  | C13  | C12  | 120.5(6) |
| N2   | C8   | C9   | 122.6(2)   | C6   | C1   | C2   | 119.5(7) |
| C4   | C3   | C2   | 121.9(2)   | C13  | C14  | C9   | 121.6(7) |
| C10  | C11  | C12  | 121.2(2)   | N1   | C7   | S1   | 111.3(5) |
| N3   | C12  | C11  | 121.9(2)   | N2   | C7   | S1   | 128.2(5) |
| N3   | C12  | C13  | 121.2(2)   | N2   | C7   | N1   | 120.5(6) |
| C11  | C12  | C13  | 116.97(19) | N2   | C8   | C9   | 122.3(7) |
| C3   | C4   | C5   | 119.8(2)   | C10  | C11  | C12  | 120.7(6) |
| C2   | C1   | C6   | 119.6(2)   | C1   | C2   | C3   | 118.5(6) |
| C13  | C14  | C9   | 121.3(2)   | C1   | C2   | C17  | 121.0(7) |
| C3   | C2   | C17  | 120.4(2)   | C3   | C2   | C17  | 120.4(7) |
| C1   | C2   | C3   | 118.8(2)   | C4   | C3   | C2   | 122.3(7) |

| 2         |     |          |          | 3         |     |          |           |
|-----------|-----|----------|----------|-----------|-----|----------|-----------|
| Atom Atom |     | Length/Å |          | Atom Atom |     | Length/Å |           |
| C1        | C2  | C17      | 120.8(2) | C6        | C5  | N1       | 111.9(6)  |
| C11       | C10 | C9       | 121.8(2) | C4        | C5  | N1       | 126.1(6)  |
| C14       | C13 | C12      | 121.4(2) | C4        | C5  | C6       | 122.0(6)  |
|           |     |          |          | C11       | C10 | C9       | 122.5(7)  |
|           |     |          |          | C3        | C4  | C5       | 117.9(7)  |
|           |     |          |          | N31       | C31 | C30      | 176.0(16) |

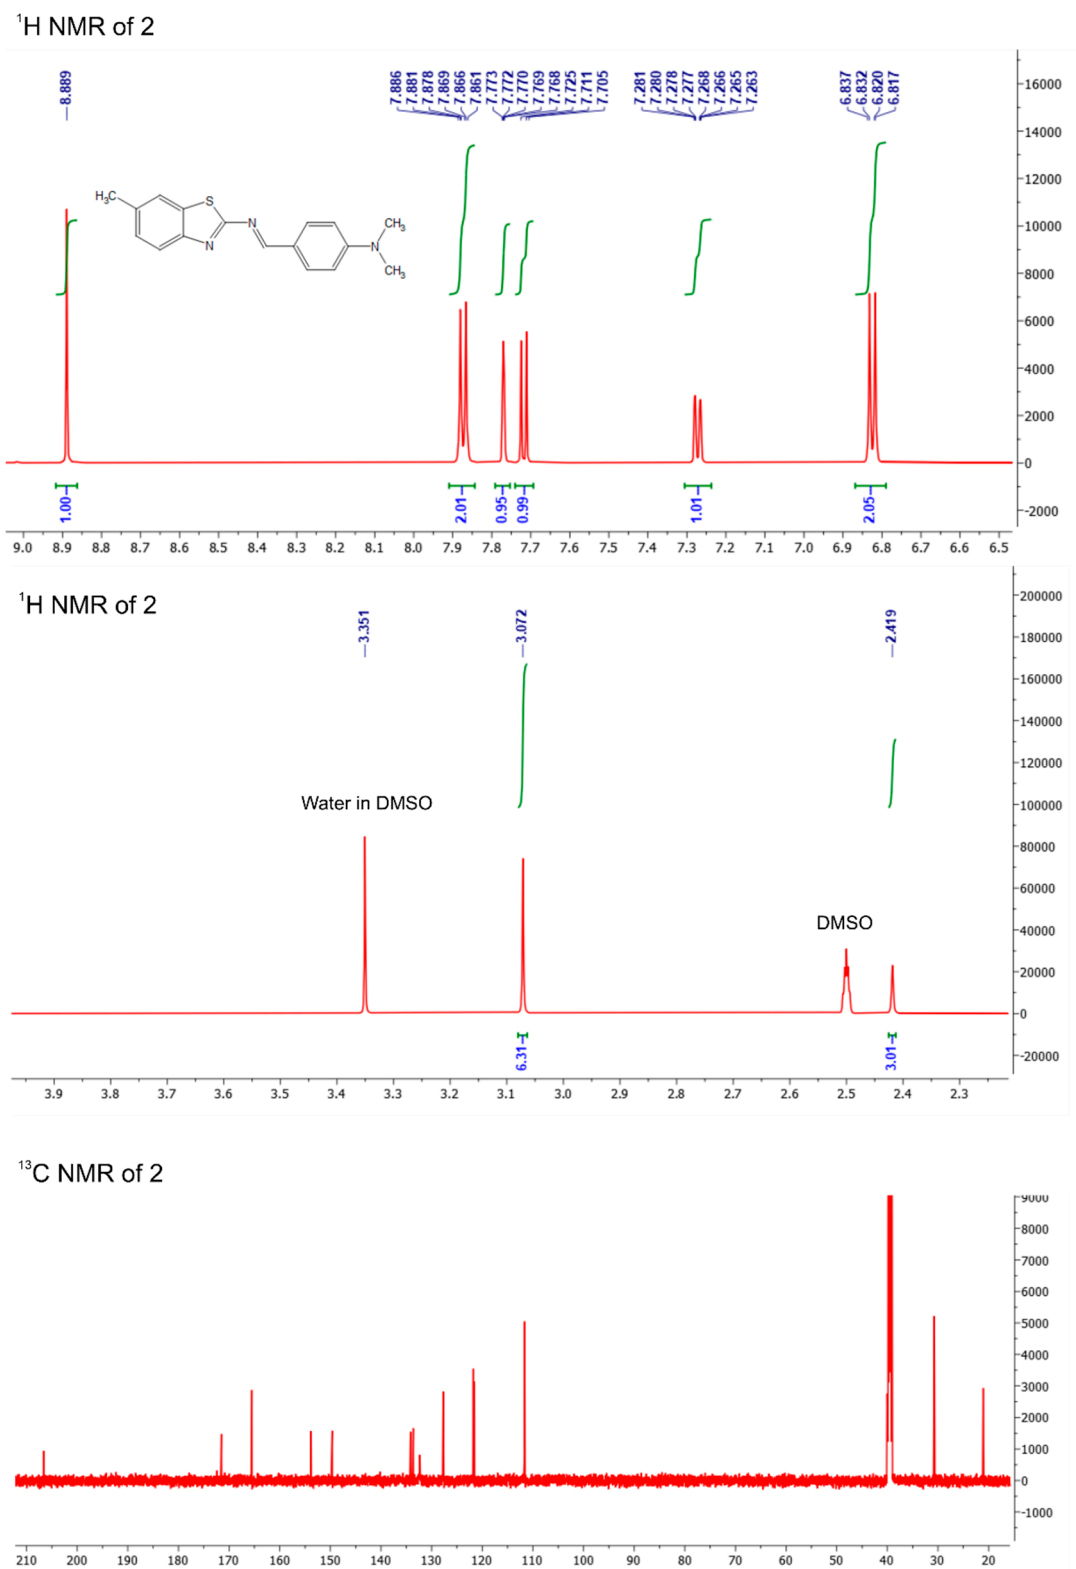**Figure S1.** <sup>1</sup>H and <sup>13</sup>C NMRs of compound 2.

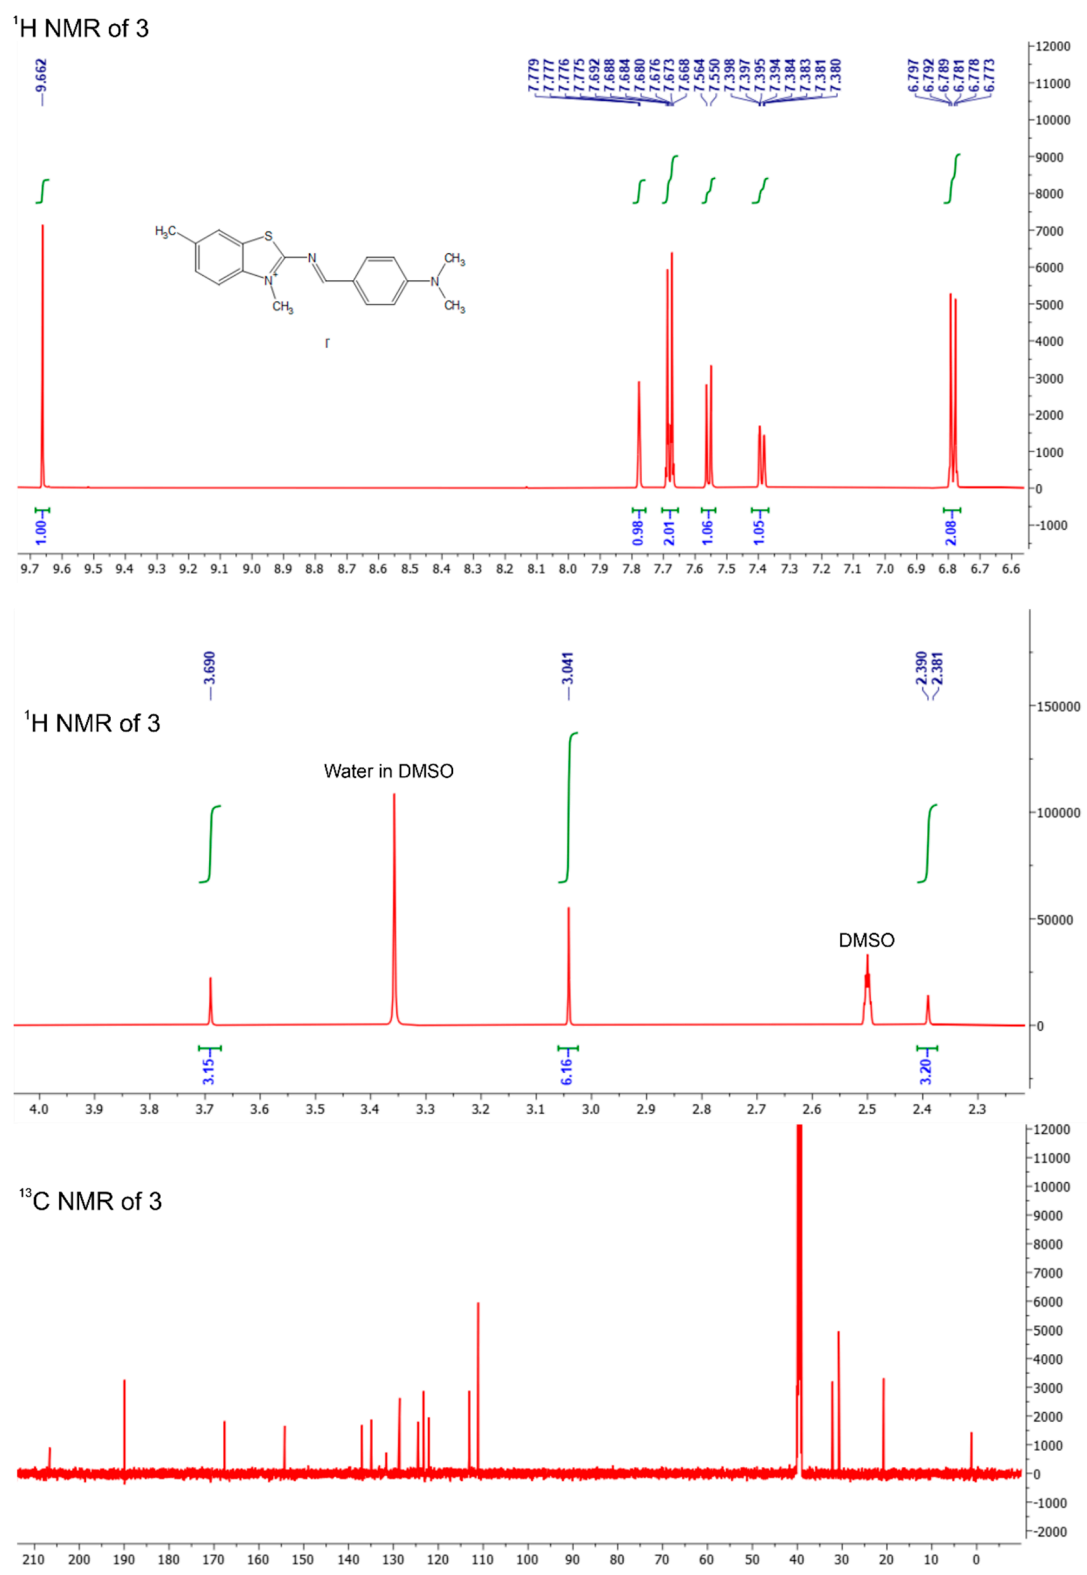Figure S2. <sup>1</sup>H and <sup>13</sup>C NMRs of compound 3.

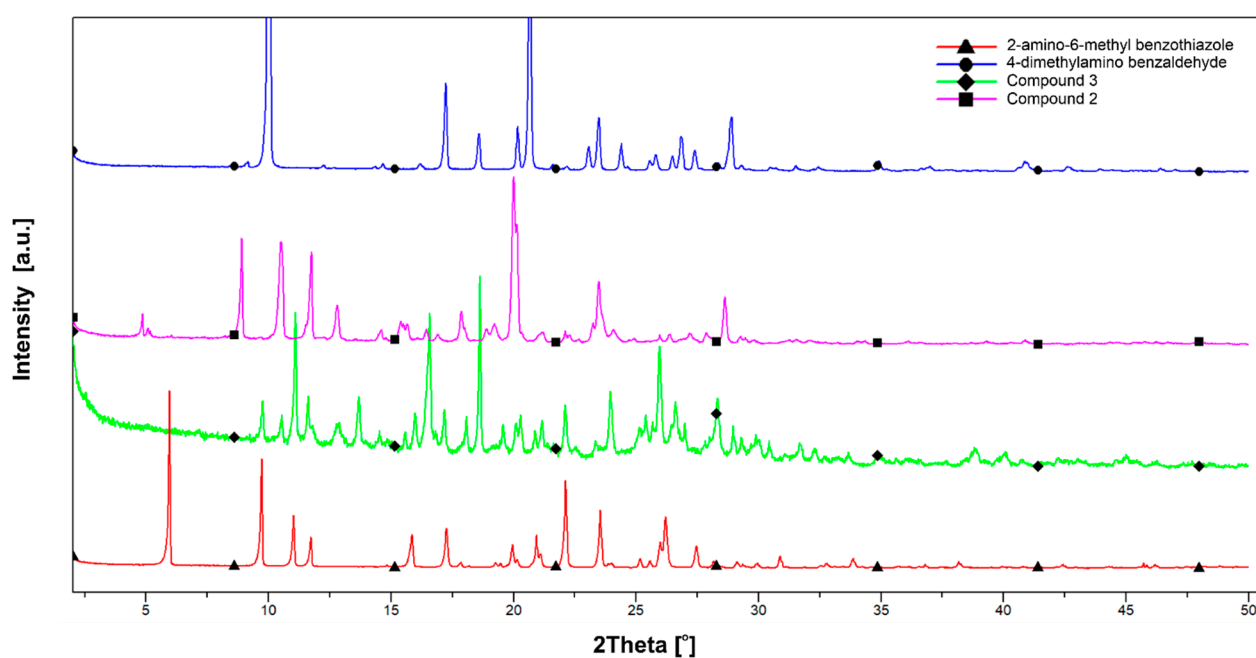

**Figure S3.** Comparison of the X-ray powder diffraction patterns of the starting and synthesized compounds 2 and 3.
